# Supplementary material
Source: Royal Society of Chemistry journal article supplement (doi:10.1039/d6su00151c)
Supplement: d6su00151c1.pdf [file d6su00151c1.pdf]

## The Impact of Cell Standardization on Niche Markets for Battery Applications: An Analysis of Various Cylindrical Cell Formats – Supplementary Materials

Table S1: Niche related market volumes.

| <b>Market niche</b>          | <b>Reference</b>                                                                               |
|------------------------------|------------------------------------------------------------------------------------------------|
| <b>Electric Wheelchair</b>   | Avicenne Energy 2022 – <b>Estimated 5%</b> of LSEV Volume 2025 <sup>1</sup>                    |
| <b>Electric Scooter</b>      | Avicenne Energy 2022 – <b>Estimated 30%</b> of eBikes Volume 2025 <sup>1</sup>                 |
| <b>Electric Bike</b>         | Avicenne Energy 2022 – eBikes Volume 2025 <sup>1</sup>                                         |
| <b>Power Tools</b>           | Avicenne Energy 2022 – PowerTools for 2025 <sup>1</sup>                                        |
| <b>Power Banks</b>           | Avicenne Energy 2022 – <b>Estimated 10%</b> of Cellular Phones Volume 2025                     |
| <b>Industrial / Maritime</b> | Avicenne Energy 2022 – BESS for Industrial/Commercial – high Scenario Volume 2025 <sup>1</sup> |
| <b>Home Storage</b>          | Avicenne Energy 2022 – Home BESS 2025 <sup>1</sup>                                             |
| <b>Golf Cart</b>             | Avicenne Energy 2022 – <b>Estimated 5%</b> of LSEV Volume 2025 <sup>1</sup>                    |
| <b>Forklift</b>              | Avicenne Energy 2022 – Forklift Volume 2025 [LIBs + Lead] <sup>1</sup>                         |
| <b>Commercial Drones</b>     | Avicenne Energy 2022 – Commercial Drone Volume 2025 <sup>1</sup>                               |
| <b>Boat / Camping</b>        | Estimated                                                                                      |

| <b>Niche</b>                 | <b>Associated systems</b> | <b>System size category</b> | <b>Theoretical system configurations</b> | <b>Covered system configurations</b> | <b>Coverage rate</b> | <b>Comment</b>                                           |
|------------------------------|---------------------------|-----------------------------|------------------------------------------|--------------------------------------|----------------------|----------------------------------------------------------|
| <b>electric Wheelchair</b>   | 18                        | M                           | 108                                      | 98                                   | 90.7%                | System Configurations below 2 Ah <sub>CC</sub> excluded  |
| <b>electric Scooter</b>      | 15                        | S                           | 60                                       | 56                                   | 93.3%                | System Configurations below 2 Ah <sub>CC</sub> excluded  |
| <b>electric Bikes</b>        | 26                        | S                           | 104                                      | 103                                  | 99.0%                | System Configurations below 2 Ah <sub>CC</sub> excluded  |
| <b>Power Tools</b>           | 60                        | XS                          | 120                                      | 91                                   | 75.8%                | System Configurations below 2 Ah <sub>CC</sub> excluded  |
| <b>Power Bank</b>            | 14                        | XS                          | 28                                       | 28                                   | 100.0%               |                                                          |
| <b>Industrial / Maritime</b> | 41                        | XL                          | 410                                      | 301                                  | 73.4%                | System Configurations above 50 Ah <sub>CC</sub> excluded |
| <b>Home Storage</b>          | 40                        | L                           | 320                                      | 236                                  | 73.8%                | System Configurations above 50 Ah <sub>CC</sub> excluded |
| <b>Golf Carts</b>            | 15                        | L                           | 120                                      | 89                                   | 74.2%                | System Configurations above 50 Ah <sub>CC</sub> excluded |
| <b>Forklift</b>              | 29                        | XL                          | 290                                      | 62                                   | 21.4%                | System Configurations above 50 Ah <sub>CC</sub> excluded |
| <b>Drones</b>                | 9                         | XS                          | 18                                       | 18                                   | 100.0%               |                                                          |
| <b>Boat / Camping</b>        | 27                        | M                           | 162                                      | 96                                   | 59.3%                | System Configurations above 50 Ah <sub>CC</sub> excluded |

Table S2: Detailed information about analyzed niches.<sup>2</sup>

Table S3: Determined cell types for scenario analysis.

| Scenario    | Cell Type            | Chemistry     | Energy density [Wh/L] | Capacity range [Ah <sub>cc</sub> ] |
|-------------|----------------------|---------------|-----------------------|------------------------------------|
| <b>N.A.</b> | 21700<br>Cylindrical | LFP//G        | 314.0 – 431.7         | 2.4 – 3.3                          |
| <b>A</b>    | 21700<br>Cylindrical | NMC811//<br>G | 565.1 – 682.9         | 3.8 – 4.6                          |
| <b>A</b>    | 21700<br>Cylindrical | NCA//SiG      | 627.9 – 745.7         | 4.2 – 5.0                          |
| <b>N.A.</b> | 18650<br>Cylindrical | LFP//G        | 306.1 – 420.9         | 1.6 – 2.2                          |
| <b>A1</b>   | 18650<br>Cylindrical | NMC811//<br>G | 551.0 – 665.8         | 2.5 – 3.1                          |
| <b>A1</b>   | 18650<br>Cylindrical | NCA//SiG      | 612.2 – 727.0         | 2.8 – 3.3                          |
| <b>A2</b>   | 4680<br>Cylindrical  | LFP//G        | 330.2 – 454.1         | 13.7 – 18.9                        |
| <b>A2</b>   | 4680<br>Cylindrical  | NMC811//<br>G | 594.4 – 718.2         | 22.0 – 26.5                        |
| <b>A2</b>   | 4680<br>Cylindrical  | NCA//SiG      | 660.4 – 781.4         | 24.4 – 29.0                        |
| <b>B1</b>   | 50100<br>Cylindrical | LFP//G        | 340.3 – 467.9         | 20.9 – 28.7                        |
| <b>B1</b>   | 20100<br>Cylindrical | NMC811//<br>G | 592.6 – 716.1         | 5.2 – 6.2                          |
| <b>B1</b>   | 16100<br>Cylindrical | NCA//SiG      | 646.2 – 767.3         | 3.6 – 4.3                          |

## References

- 1 C. Pillot, *Worldwide Rechargeable Battery Market 2021-2030. 29th Version*, 2022.
- 2 R. Jan-Hendrik, *Dataset of devices for market analysis and modelling*, 2025.
